# Supplementary material for: Highly efficient flexible Li–S full batteries with hollow Ru–RuO2−xnanofibers as robust polysulfide anchoring-catalysts and lithium dendrite inhibitors
Source: Royal Society of Chemistry journal article supplement (doi:10.1039/d2ta01573k), 2022-01-01
Supplement: d2ta01573k1.pdf [file d2ta01573k1.pdf]

## Supporting Information

# Highly Efficient Flexible Li-S Full Batteries with Hollow Ru-RuO<sub>2-x</sub> Nanofibers as Robust Polysulfide Anchoring-catalysts and Lithium Dendrite Inhibitors

Yuan Tian,<sup>a</sup> Ming Yang,<sup>\*b</sup> Cheng Wang <sup>\*a</sup>

Dr. Y. Tian, Prof. C. Wang

Institute for New Energy Materials and Low-Carbon Technologies, School of Materials Science and Engineering, Tianjin Key Laboratory of Advanced Functional Porous Materials, Tianjin University of Technology, Tianjin 300384, China. E-mail: cwang@tjut.edu.cn

Prof. M. Yang

National Key Laboratory of Science and Technology on Power Sources, Tianjin Institute of Power Sources, Tianjin 300384, China. E-mail: yangmingnk@163.com

## Contents:

**Table S1.** BET results summary of RuO<sub>2</sub>@PAN, RuO<sub>2-x</sub>@NC, Ru-RuO<sub>2-x</sub>@NC and Ru@NC composites according to nitrogen adsorption-desorption isotherm.

**Table S2.** Electrochemical performance comparison of this work with that of other Ru-based composite cathodes in recent works.

**Table S3.** The relevant parameters of the active materials in the Ru-based cathodes.

**Fig. S1.** Schematic illustration of the synthetic procedure for the Ru-based products and the corresponding digital photos.

**Fig. S2.** XRD patterns of (a) RuCl<sub>3</sub>@PAN-O, (b) RuO<sub>2</sub>@PAN, (c) Ru-RuO<sub>2-x</sub>@NC, (d) RuO<sub>2-x</sub>@NC and (e) Ru@NC.

**Fig. S3.** (a) HRTEM image, (b) IFFT lattice image, (c) lattice spacing profiles at the selected areas in green and blue, (d) SAED pattern at the selected area in red and (e) high-magnification elemental mappings of RuO<sub>2-x</sub>@NC.

**Fig. S4.** (a) TEM image and (b) HRTEM image of Ru@NC.

**Fig. S5.** (a) N<sub>2</sub> adsorption/desorption isotherms and (b) pore size distributions of RuO<sub>2</sub>@PAN, RuO<sub>2-x</sub>@NC, Ru-RuO<sub>2-x</sub>@NC and Ru@NC.

**Fig. S6.** Li 1s high-resolution XPS spectra of Li<sub>2</sub>S<sub>6</sub> and Li<sub>2</sub>S<sub>6</sub>-Ru-RuO<sub>2-x</sub>.

**Fig. S7.** CV curves of a Ru-Ru<sub>2-x</sub>@NC symmetric cell for several cycles.

**Fig. S8.** (a) LSV curves of Li<sub>2</sub>S oxidization and (b) Tafel plots of Li<sub>2</sub>S oxidization on RuO<sub>2</sub>@PAN, RuO<sub>2-x</sub>@NC, Ru-RuO<sub>2-x</sub>@NC and Ru@NC.

**Fig. S9.** CV curves of different Li-S batteries for S/Ru-RuO<sub>2-x</sub>@NC, S/RuO<sub>2-x</sub>@NC, S/Ru@NC and S/RuO<sub>2</sub>@PAN cathodes.

**Fig. S10.** CV curves of the Li-S battery for the S/Ru-RuO<sub>2-x</sub>@NC cathode with a scanning rate of 0.1 mV s<sup>-1</sup>.

**Fig. S11.** Charge-discharge profiles of the Li-S batteries for (a) the S/Ru-RuO<sub>2-x</sub>@NC cathode, (b) the S/RuO<sub>2-x</sub>@NC cathode, (c) the S/Ru@NC cathode and (d) the S/RuO<sub>2</sub>@PAN cathode.

**Fig. S12.** Cycling performances at 0.1 C of the Li-S batteries for the S/Ru-RuO<sub>2-x</sub>@NC, S/RuO<sub>2-x</sub>@NC, S/Ru@NC and S/RuO<sub>2</sub>@PAN cathodes.

**Fig. S13.** Cycling performance for (a) Li/RuO<sub>2-x</sub>@NC, (b) Li/Ru@NC and (c)

Li/RuO<sub>2</sub>@PAN symmetric cells at 1 mA cm<sup>-2</sup> and 1 mAh cm<sup>-2</sup>.

**Fig. S14.** Detailed voltage profiles of Li and Li/Ru-RuO<sub>2-x</sub>@NC symmetric cells at 1 mA cm<sup>-2</sup> and 1 mAh cm<sup>-2</sup>.

**Fig. S15.** SEM image of Li/Ru-RuO<sub>2-x</sub>@NC electrode over cycling 200h at 1 mA cm<sup>-2</sup> and 1 mAh cm<sup>-2</sup>.

**Fig. S16.** EIS plots of bare Li and Li/Ru-RuO<sub>2-x</sub>@NC symmetric cells over cycling 200h.

**Fig. S17.** (a) Schematic diagram for the S/Ru-RuO<sub>2-x</sub>@NC cathode and the Li/Ru-RuO<sub>2-x</sub>@NC anode; (b) Schematic configuration of the S/Ru-RuO<sub>2-x</sub>@NC||Li/Ru-RuO<sub>2-x</sub>@NC full battery and a traditional Li-S battery.

**Fig. S18.** Voltage profiles of (a) S/RuO<sub>2-x</sub>@NC||Li/RuO<sub>2-x</sub>@NC, (b) S/Ru@NC||Li/Ru@NC and (c) S/RuO<sub>2</sub>@PAN||Li/RuO<sub>2</sub>@PAN cells at different current rates.

**Fig. S19.** Magnified XRD patterns of RuO<sub>2</sub>@PAN, RuO<sub>2-x</sub>@NC and Ru-RuO<sub>2-x</sub>@NC.

**Fig. S20.** (a) Ru-3d and (b) total DOS patterns of RuO<sub>2</sub>, RuO<sub>2-x</sub>, Ru-RuO<sub>2-x</sub> and Ru.

**Fig. S21.** Geometrically stable configurations of RuO<sub>2</sub>, RuO<sub>2-x</sub>, Ru-RuO<sub>2-x</sub> and Ru.

**Fig. S22.** (a) The optimized molecular structures of the most stable isolated LiPSs in the ground state and (b) the shortest distances of Li-S and S-S bonds.

**Fig. S23.** DFT calculation results of optimized geometrical configurations of various LiPSs on (a) RuO<sub>2</sub>, (b) RuO<sub>2-x</sub>, (c) Ru-RuO<sub>2-x</sub> and (d) Ru.

**Fig. S24.** (a) Energy barrier of Li<sub>2</sub>S decomposition and (b) Li<sup>+</sup> diffusion energy barrier on RuO<sub>2</sub>, RuO<sub>2-x</sub>, Ru-RuO<sub>2-x</sub> and Ru.

**Fig. S25.** Binding energy and optimized geometrical configurations of a Li atom with Ru-RuO<sub>2-x</sub>, RuO<sub>2-x</sub>, RuO<sub>2</sub> and Ru.

**Table S1.** BET results summary of RuO<sub>2</sub>@PAN, RuO<sub>2-x</sub>@NC, Ru-RuO<sub>2-x</sub>@NC and Ru@NC composites according to nitrogen adsorption-desorption isotherm.

| Characteristics                               | RuO <sub>2</sub> @PAN | RuO <sub>2-x</sub> @NC | Ru-RuO <sub>2-x</sub> @NC | Ru@NC  |
|-----------------------------------------------|-----------------------|------------------------|---------------------------|--------|
| SSA (m <sup>2</sup> g <sup>-1</sup> )         | 28.65                 | 81.75                  | 344.19                    | 196.81 |
| Pore volume (m <sup>3</sup> g <sup>-1</sup> ) | 0.05                  | 0.15                   | 0.55                      | 0.51   |
| Pore width (nm)                               | 5.88                  | 3.78                   | 5.08                      | 3.77   |

**Table S2.** Electrochemical performance comparison of this work with that of other Ru-based composite cathodes in recent works.

| Cathode material                                             | Sulfur loading (mg cm <sup>-2</sup> ) | Initial capacity (mAh g <sup>-1</sup> ) | Capacity fading rate & cycles | Rate capability (mAh g <sup>-1</sup> ) | Ref.      |
|--------------------------------------------------------------|---------------------------------------|-----------------------------------------|-------------------------------|----------------------------------------|-----------|
| S/Ru-RuO <sub>2-x</sub> @NC                                  | 1.4                                   | 1.0 C, 1095                             | 0.015%, 1000                  | 8.0 C, 835                             | This work |
| RuO <sub>2</sub> @NMCs/S                                     | 1.5                                   | 0.5 C, 1065                             | 0.07%, 500                    | 5.0 C, 634                             | [1]       |
| Graphene/RuO <sub>2</sub> /S                                 | 1.5                                   | 1.0 C, 685                              | 0.054%, 800                   | 2.0 C, 543                             | [2]       |
| S/RuO <sub>2</sub>                                           | 1.4                                   | 1.0 C, 833                              | 0.08%, 500                    | 5.0 C, 479                             | [3]       |
| RuO <sub>2</sub> -UPCS@S                                     | 2.0                                   | 0.2 C, 1301                             | --,--                         | 2.0 C, 985                             | [4]       |
| 3D CNTs@10% RuO <sub>2</sub> @Li <sub>2</sub> S <sub>6</sub> | 2.0                                   | 0.5 C, 1060                             | 0.06%, 1000                   | 2.0 C, 750                             | [5]       |

**Table S3.** The relevant parameters of the active materials in the Ru-based cathodes.

| Volume of 1.0M Li <sub>2</sub> S <sub>6</sub> catholyte (μL) | Sulfur mass (mg) | Sulfur loading (mg cm <sup>-2</sup> ) | Electrolyte/S ratio (E/S, μL mg <sup>-1</sup> ) |
|--------------------------------------------------------------|------------------|---------------------------------------|-------------------------------------------------|
| 10                                                           | 1.9              | 1.7                                   | 15.8                                            |
| 24                                                           | 4.6              | 4.1                                   | 9.6                                             |
| 32                                                           | 6.1              | 5.4                                   | 8.5                                             |
| 40                                                           | 7.7              | 6.8                                   | 7.8                                             |

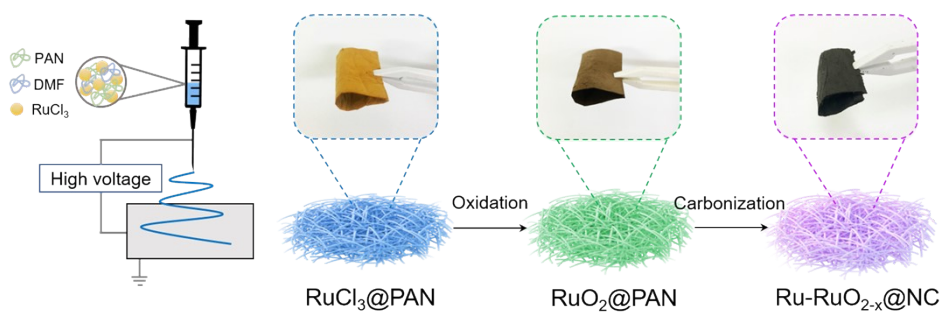

**Fig. S1.** Schematic illustration of the synthetic procedure for the Ru-based products and the corresponding digital photos.

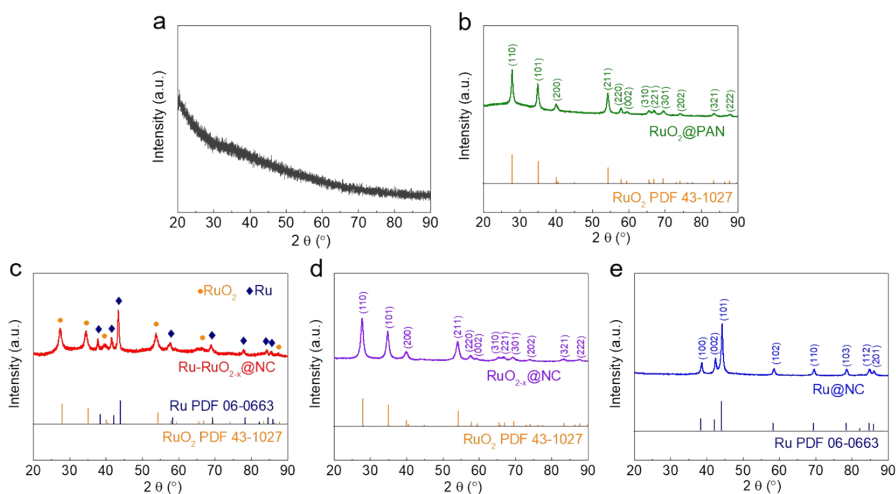

**Fig. S2.** XRD patterns of (a)  $\text{RuCl}_3\text{@PAN-O}$ , (b)  $\text{RuO}_2\text{@PAN}$ , (c)  $\text{Ru-RuO}_{2-x}\text{@NC}$ , (d)  $\text{RuO}_{2-x}\text{@NC}$  and (e)  $\text{Ru@NC}$ .

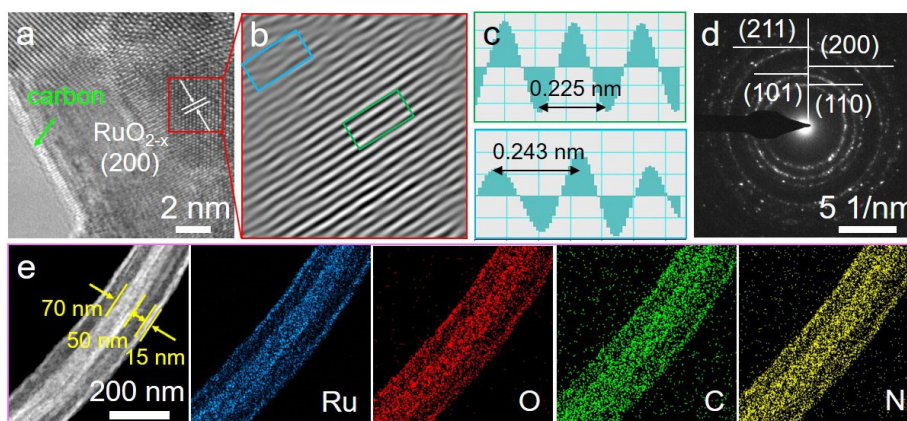

**Fig. S3.** (a) HRTEM image, (b) IFFT lattice image, (c) lattice spacing profiles at the selected areas in green and blue, (d) SAED pattern at the selected area in red and (e) high-magnification elemental mappings of  $\text{RuO}_{2-x}\text{@NC}$ .

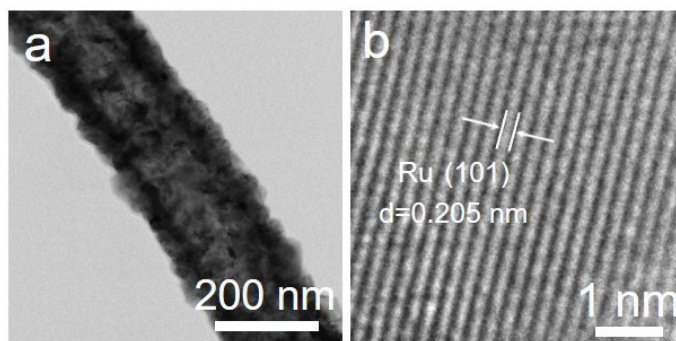

**Fig. S4.** (a) TEM image and (b) HRTEM image of Ru@NC.

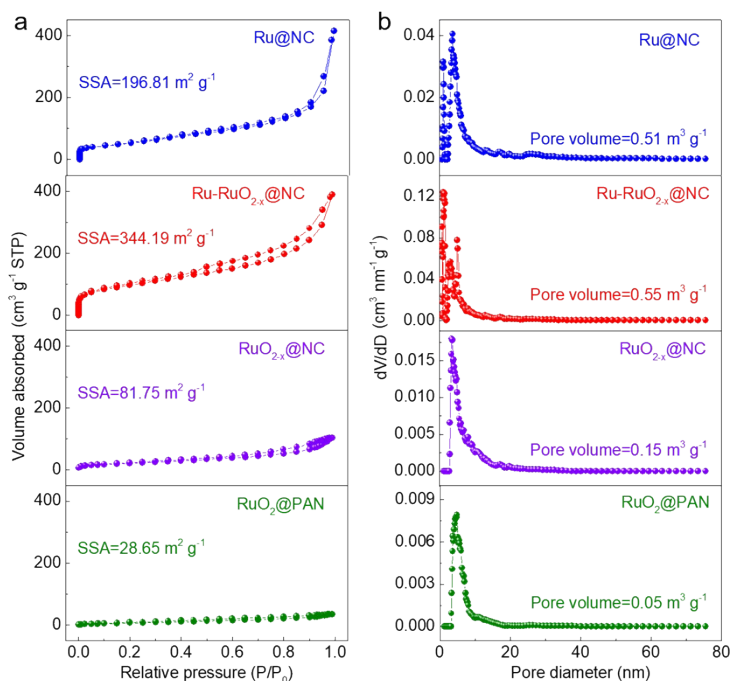

**Fig. S5.** (a) N<sub>2</sub> adsorption/desorption isotherms and (b) pore size distributions of RuO<sub>2</sub>@PAN, RuO<sub>2-x</sub>@NC, Ru-RuO<sub>2-x</sub>@NC and Ru@NC.

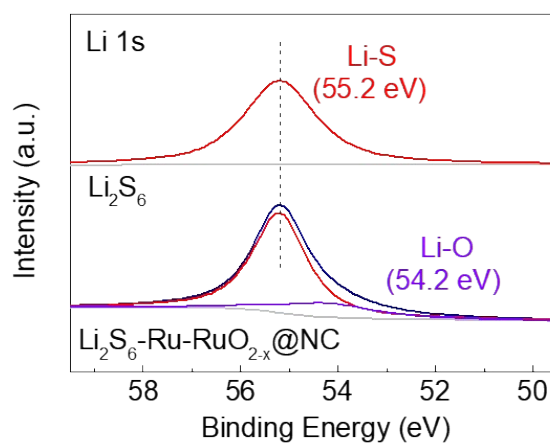

**Fig. S6.** Li 1s high-resolution XPS spectra of Li<sub>2</sub>S<sub>6</sub> and Li<sub>2</sub>S<sub>6</sub>-Ru-RuO<sub>2-x</sub>.

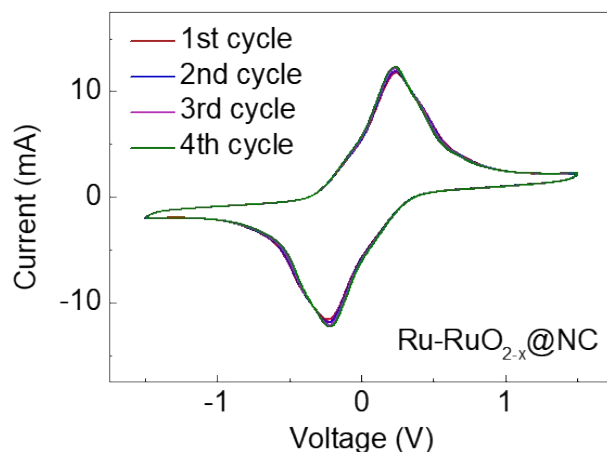

**Fig. S7.** CV curves of a Ru-Ru<sub>2-x</sub>@NC symmetric cell for several cycles.

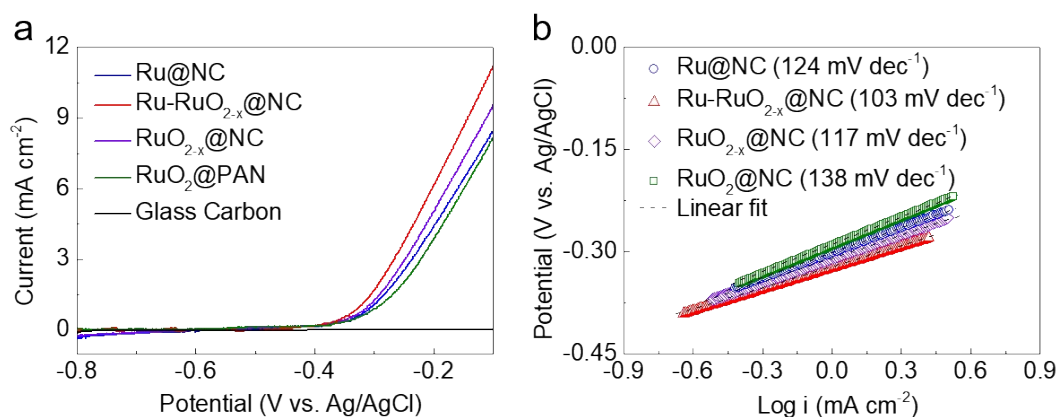

**Fig. S8.** (a) LSV curves of Li<sub>2</sub>S oxidation and (b) Tafel plots of Li<sub>2</sub>S oxidation on RuO<sub>2</sub>@PAN, RuO<sub>2-x</sub>@NC, Ru-RuO<sub>2-x</sub>@NC and Ru@NC.

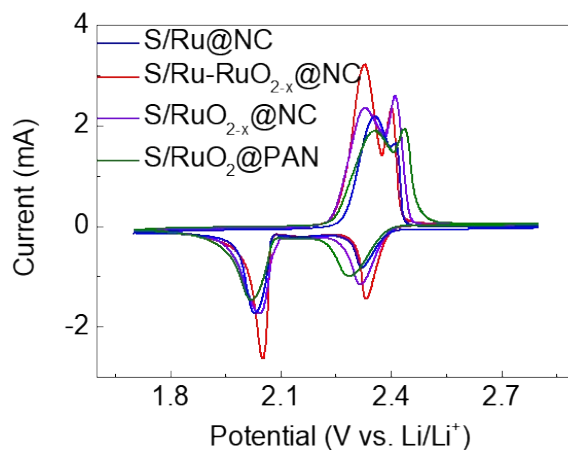

**Fig. S9.** CV curves of different Li-S batteries for S/Ru-RuO<sub>2-x</sub>@NC, S/RuO<sub>2-x</sub>@NC, S/Ru@NC and S/RuO<sub>2</sub>@PAN cathodes.

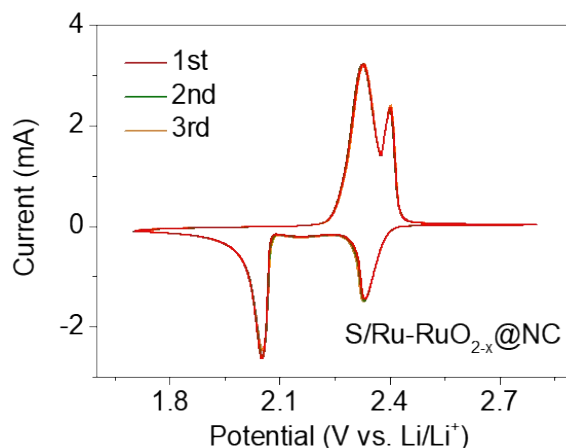

**Fig. S10.** CV curves of the Li-S battery for the S/Ru-RuO<sub>2-x</sub>@NC cathode with a scanning rate of 0.1 mV s<sup>-1</sup>.

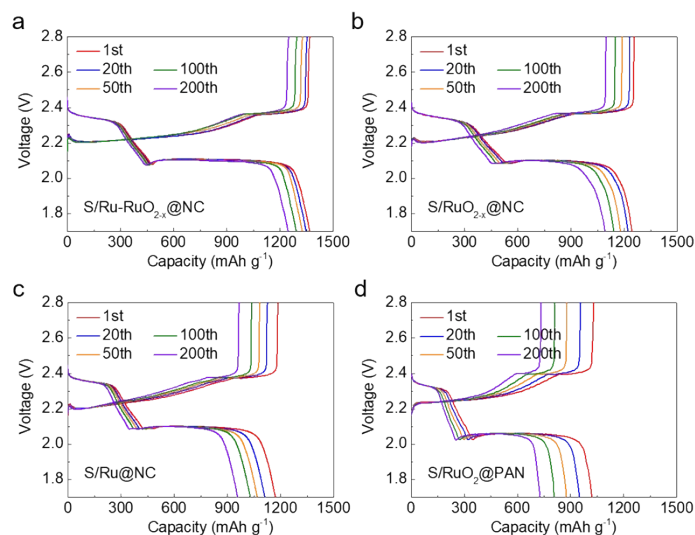

**Fig. S11.** Charge-discharge profiles of the Li-S batteries for (a) the S/Ru-RuO<sub>2-x</sub>@NC cathode, (b) the S/RuO<sub>2-x</sub>@NC cathode, (c) the S/Ru@NC cathode and (d) the S/RuO<sub>2</sub>@PAN cathode.

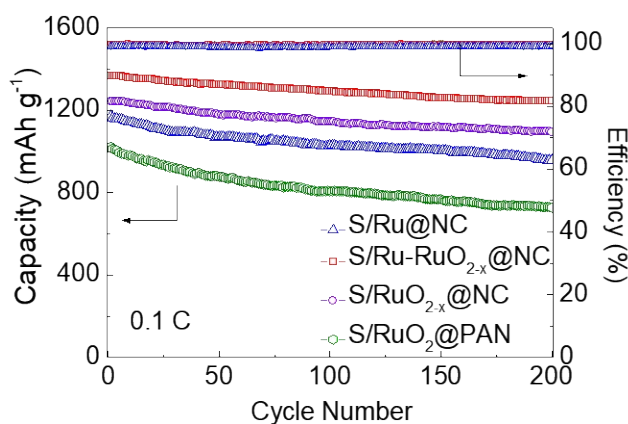

**Fig. S12.** Cycling performances at 0.1 C of the Li-S batteries for the S/Ru-RuO<sub>2-x</sub>@NC, S/RuO<sub>2-x</sub>@NC, S/Ru@NC and S/RuO<sub>2</sub>@PAN cathodes.



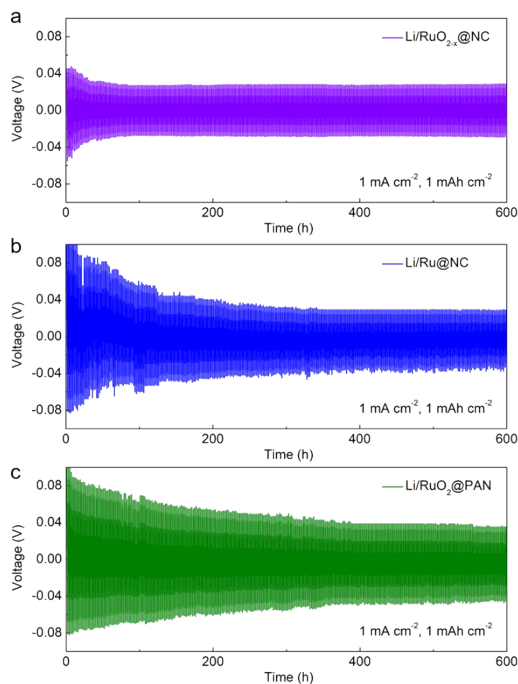

**Fig. S13.** Cycling performance for (a)  $\text{Li/RuO}_{2-x}\text{@NC}$ , (b)  $\text{Li/Ru@NC}$  and (c)  $\text{Li/RuO}_2\text{@PAN}$  symmetric cells at  $1 \text{ mA cm}^{-2}$  and  $1 \text{ mAh cm}^{-2}$ .

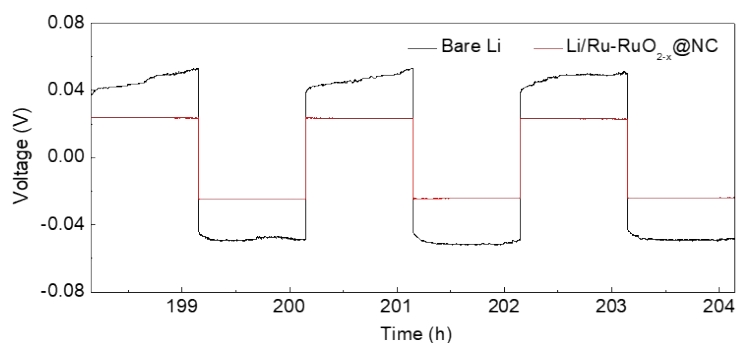

**Fig. S14.** Detailed voltage profiles of Li and  $\text{Li/Ru-RuO}_{2-x}\text{@NC}$  symmetric cells at  $1 \text{ mA cm}^{-2}$  and  $1 \text{ mAh cm}^{-2}$ .

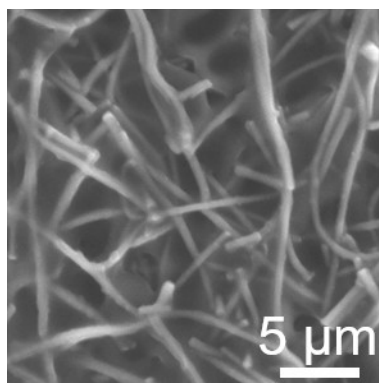

**Fig. S15.** SEM image of  $\text{Li/Ru-RuO}_{2-x}\text{@NC}$  electrode over cycling 200h at  $1 \text{ mA cm}^{-2}$  and  $1 \text{ mAh cm}^{-2}$ .

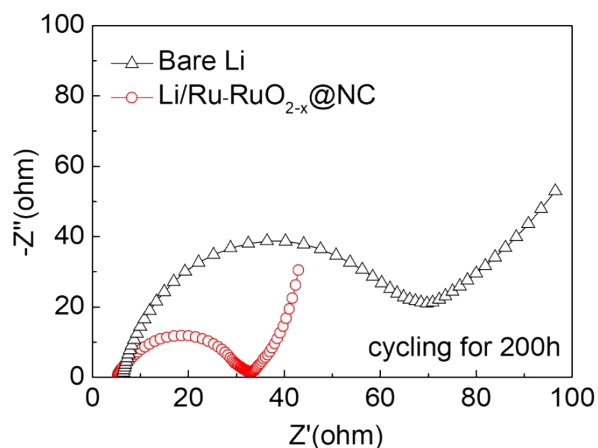

**Fig. S16.** EIS plots of bare Li and Li/Ru-RuO<sub>2-x</sub>@NC symmetric cells over cycling 200h.

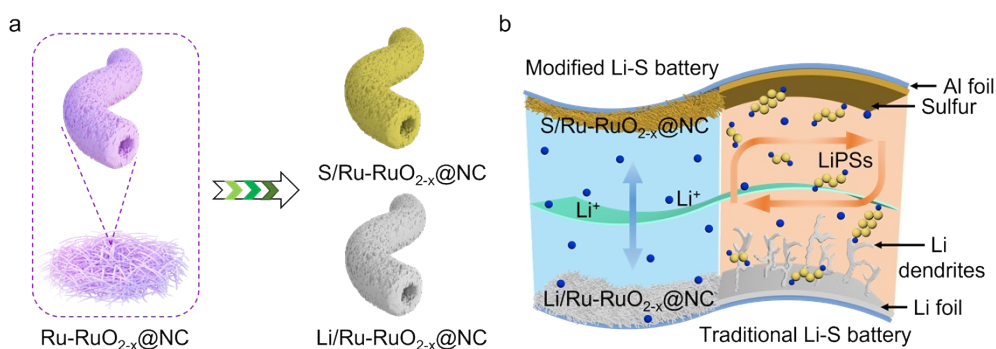

**Fig. S17.** (a) Schematic diagram for the S/Ru-RuO<sub>2-x</sub>@NC cathode and the Li/Ru-RuO<sub>2-x</sub>@NC anode; (b) Schematic configuration of the S/Ru-RuO<sub>2-x</sub>@NC||Li/Ru-RuO<sub>2-x</sub>@NC full battery and a traditional Li-S battery.

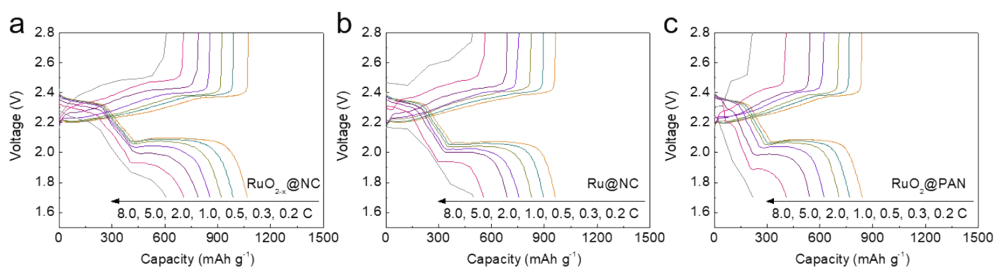

**Fig. S18.** Voltage profiles of (a) S/RuO<sub>2-x</sub>@NC||Li/RuO<sub>2-x</sub>@NC, (b) S/Ru@NC||Li/Ru@NC and (c) S/RuO<sub>2</sub>@PAN||Li/RuO<sub>2</sub>@PAN cells at different current rates.

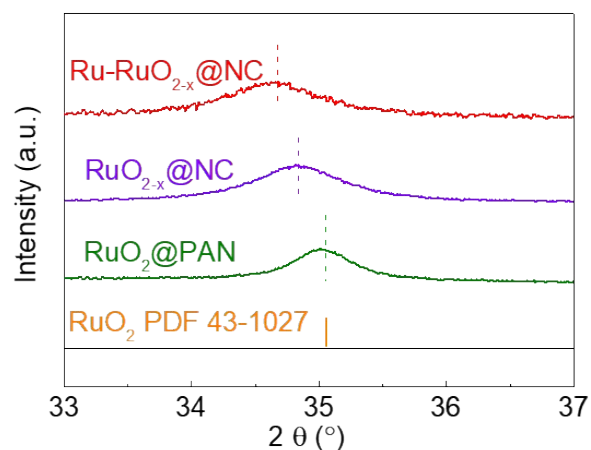

**Fig. S19.** Magnified XRD patterns of  $\text{RuO}_2@PAN$ ,  $\text{RuO}_{2-x}@NC$  and  $\text{Ru-RuO}_{2-x}@NC$ .

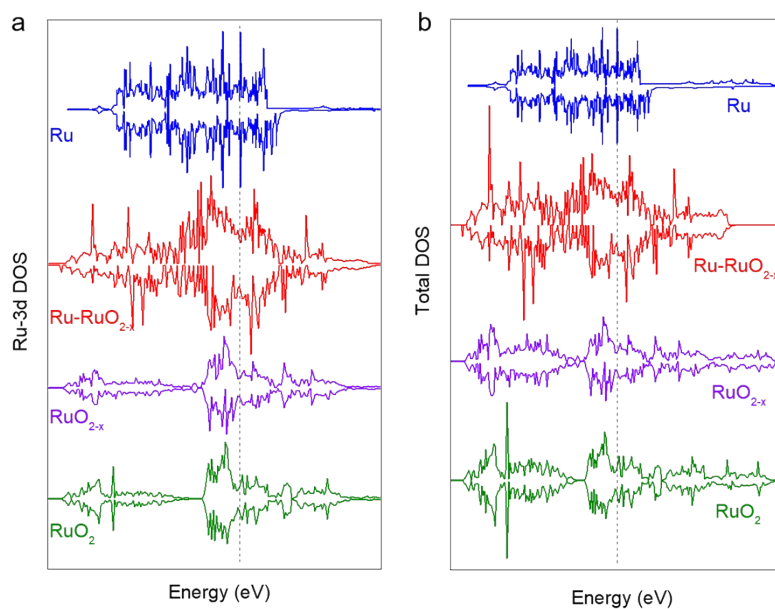

**Fig. S20.** (a) Ru-3d and (b) total DOS patterns of  $\text{RuO}_2$ ,  $\text{RuO}_{2-x}$ ,  $\text{Ru-RuO}_{2-x}$  and Ru.

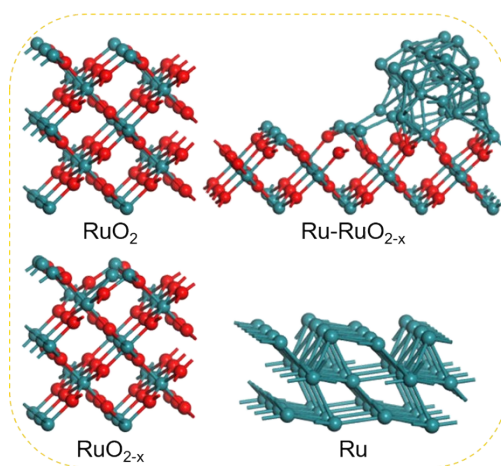

**Fig. S21.** Geometrically stable configurations of  $\text{RuO}_2$ ,  $\text{RuO}_{2-x}$ ,  $\text{Ru-RuO}_{2-x}$  and Ru.

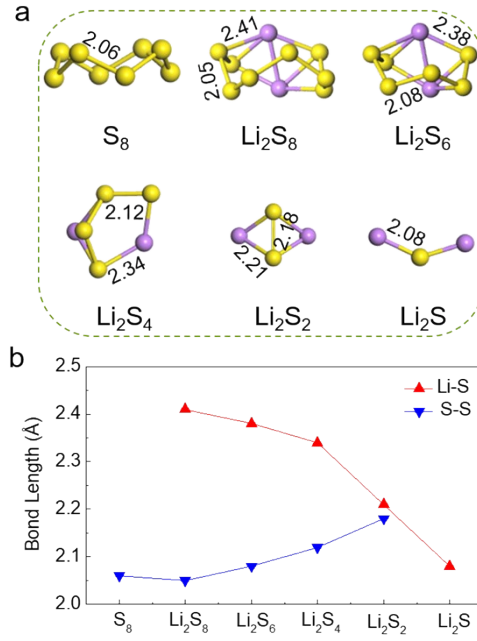

**Fig. S22.** (a) The optimized molecular structures of the most stable isolated LiPSs in the ground state and (b) the shortest distances of Li-S and S-S bonds.

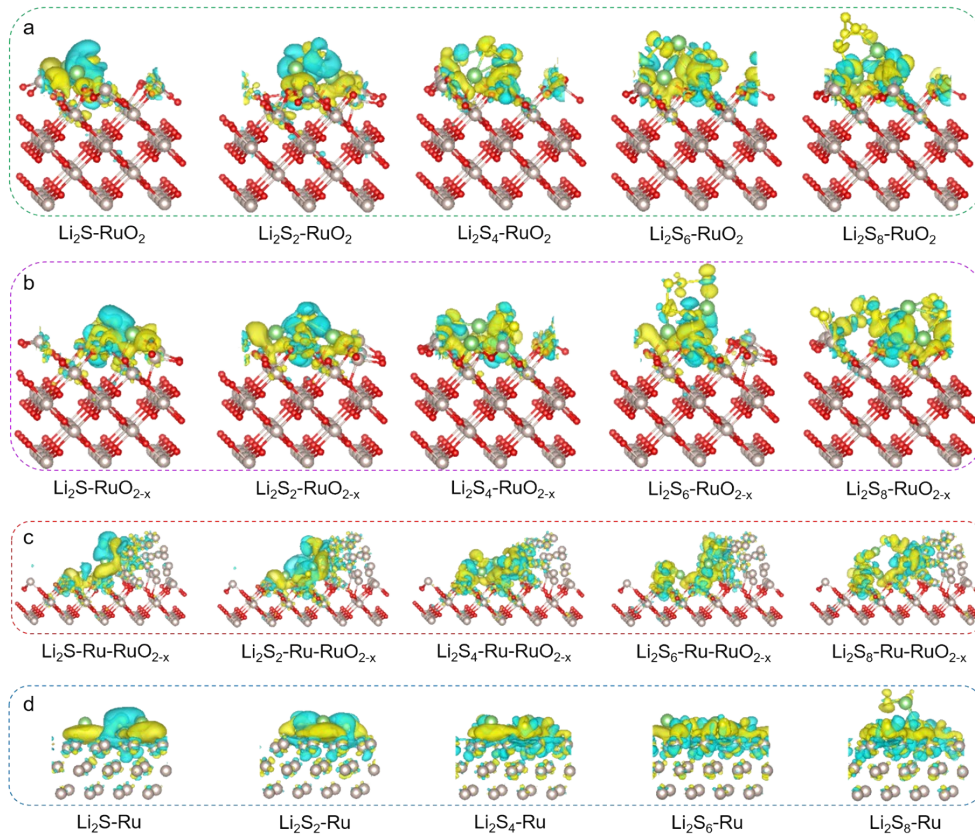

**Fig. S23.** DFT calculation results of optimized geometrical configurations of various LiPSs on (a) RuO<sub>2</sub>, (b) RuO<sub>2-x</sub>, (c) Ru-RuO<sub>2-x</sub> and (d) Ru.

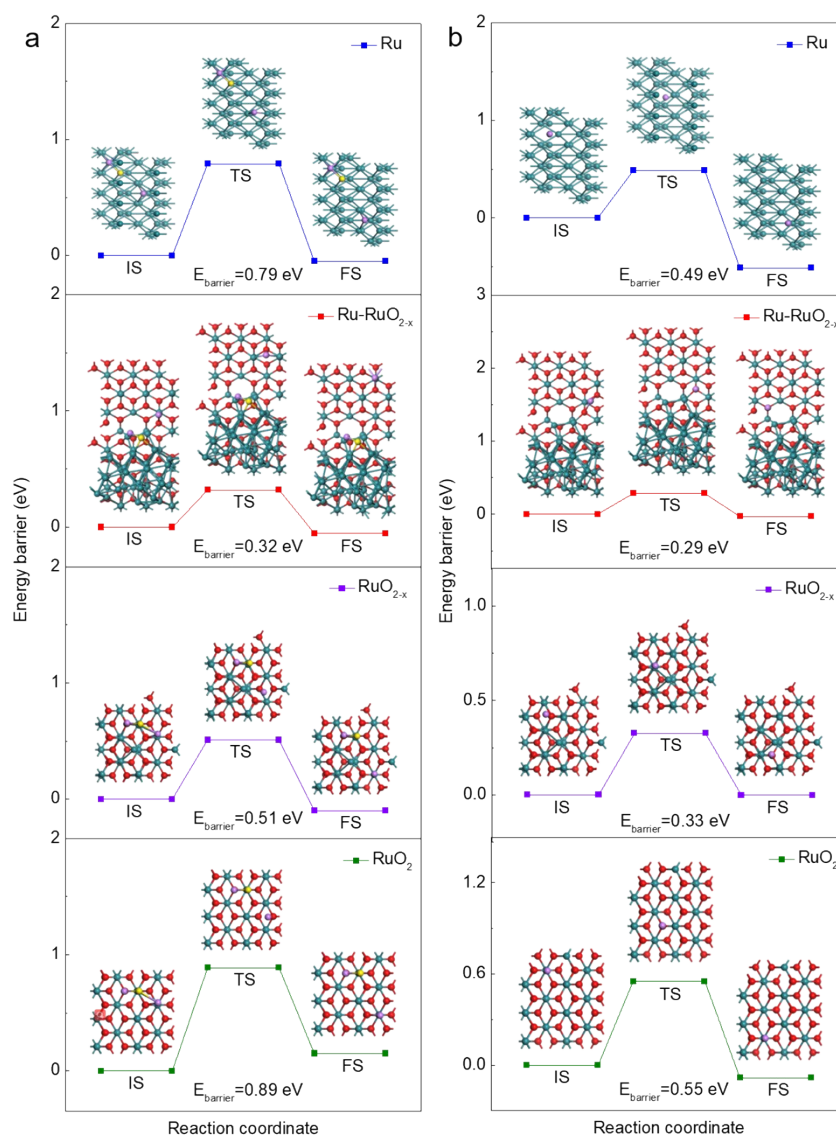

**Fig. S24.** (a) Energy barrier of  $\text{Li}_2\text{S}$  decomposition and (b)  $\text{Li}^+$  diffusion energy barrier on  $\text{RuO}_2$ ,  $\text{RuO}_{2-x}$ ,  $\text{Ru-RuO}_{2-x}$  and  $\text{Ru}$ .

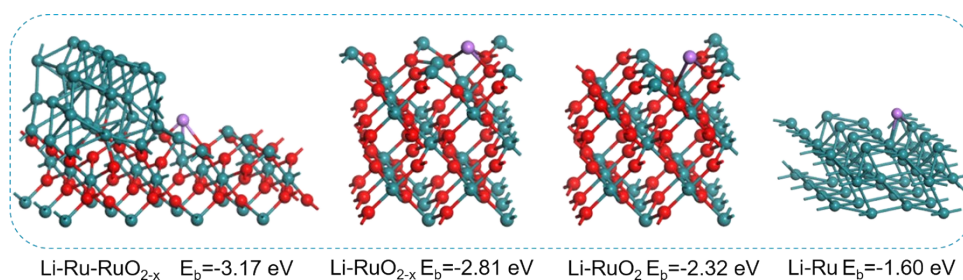

**Fig. S25.** Binding energy and optimized geometrical configurations of a  $\text{Li}$  atom with  $\text{Ru-RuO}_{2-x}$ ,  $\text{RuO}_{2-x}$ ,  $\text{RuO}_2$  and  $\text{Ru}$ .

## References

- [1] R. Wang, K. Wang, S. Gao, M. Jiang, J. Han, M. Zhou, S. Cheng and K. Jiang, *Nanoscale*, 2018, **10**, 16730-16737.
- [2] J. Huang, J. Q. Huang, W. G. Chong, J. Cui, S. S. Yao, B. L. Huang and J. Kim, *J. Energy Chem.*, 2019, **35**, 204-211.
- [3] Z. Y. Wang, D. D. Han, S. Liu, G. R. Li, T. Y. Yan and X. P. Gao, *Electrochim. Acta*, 2020, **337**, 135772.
- [4] X. Q. Guo, H. L. Yu, X. F. Liu, Y. C. Lu, Q. C. Liu and Z. J. Li, *ChemistrySelect*, 2019, **4**, 7463-7469.
- [5] Q. Lu, Y. Sun, K. M. Liao, X. H. Zou, I. Hamada, W. Zhou, M. Ni and Z. P. Shao, *Electrochim. Acta*, 2019, **298**, 421-429.
